# Supplementary material
Source: ML conference proceedings conference paper supplement (https://openreview.net/forum?id=QGQsOZcQ2H)
Supplement: supplementary_material [file attachment]

435  
436

**Supplementary Material for:  
Neural Oscillators are Universal**

437 **A Another universality result for neural oscillators**

438 The universal approximation Theorem 3.1 immediately implies another universal approximation  
439 results for neural oscillators, as explained next. We consider a continuous map  $F : \mathbb{R}^p \rightarrow \mathbb{R}^q$ ; our  
440 goal is to show that  $F$  can be approximated to given accuracy  $\epsilon$  by suitably defined neural oscillators.  
441 Fix a time interval  $[0, T]$  for (an arbitrary choice)  $T = 2$ . Let  $K_0 \subset \mathbb{R}^p$  be a compact set. Given  
442  $\xi \in \mathbb{R}^p$ , we associate with it a function  $u_\xi(t) \in C_0([0, T]; \mathbb{R}^p)$ , by setting

$$u_\xi(t) := t\xi. \tag{A.1}$$

443 Clearly, the set  $K := \{u_\xi \mid \xi \in K_0\}$  is compact in  $C_0([0, T]; \mathbb{R}^p)$ . Furthermore, we can define an  
444 operator  $\Phi : C_0([0, T]; \mathbb{R}^p) \rightarrow C_0([0, T]; \mathbb{R}^q)$ , by

$$\Phi(u)(t) := \begin{cases} 0, & t \in [0, 1), \\ (t-1)F(u(1)), & t \in [1, T]. \end{cases} \tag{A.2}$$

445 where  $F : \mathbb{R}^p \rightarrow \mathbb{R}^q$  is the given continuous function that we wish to approximate. One readily  
446 checks that  $\Phi$  defines a causal and continuous operator. Note, in particular, that

$$\Phi(u_\xi)(T) = (T-1)F(u_\xi(1)) = F(\xi),$$

447 is just the evaluation of  $F$  at  $\xi$ , for any  $\xi \in K_0$ .

448 Since neural oscillators can uniformly approximate the operator  $\Phi$  for inputs  $u_\xi \in K$ , then as a  
449 consequence of Theorem 3.1 and (2.3), it follows that, for any  $\epsilon > 0$  there exists  $m \in \mathbb{N}$ , matrices  
450  $W \in \mathbb{R}^{m \times m}$ ,  $V \in \mathbb{R}^{m \times p}$  and  $A \in \mathbb{R}^{q \times m}$ , and bias vectors  $b \in \mathbb{R}^m$ ,  $c \in \mathbb{R}^q$ , such that for any  
451  $\xi \in K_0$ , the neural oscillator system,

$$\begin{cases} \ddot{y}_\xi(t) = \sigma(Wy_\xi(t) + tV\xi + b), & \text{(A.3)} \\ y_\xi(0) = \dot{y}_\xi(0) = 0, & \text{(A.4)} \\ z_\xi(t) = Ay_\xi(t) + c, & \text{(A.5)} \end{cases}$$

452 satisfies

$$|z_\xi(T) - F(\xi)| = |z_\xi(T) - \Phi(u_\xi)(T)| \leq \sup_{t \in [0, T]} |z_\xi(t) - \Phi(u_\xi)(t)| \leq \epsilon,$$

453 uniformly for all  $\xi \in K_0$ . Hence, neural oscillators can be used to approximate an arbitrary continuous  
454 function  $F : \mathbb{R}^p \rightarrow \mathbb{R}^q$ , uniformly over compact sets. Thus, neural oscillators also provide universal  
455 function approximation.

456 **B Proof of Theorem 3.1**

457 **B.1 Proof of Lemma 3.4**

458 *Proof.* We can rewrite  $y(t) = \frac{1}{\omega} \int_0^t u(\tau) \sin(\omega(t-\tau)) d\tau$ . By direct differentiation, one readily  
459 verifies that  $y(t)$  so defined, satisfies

$$\dot{y}(t) = \int_0^t u(\tau) \cos(\omega(t-\tau)) d\tau + [u(\tau) \sin(\omega(t-\tau))]_{\tau=t} = \int_0^t u(\tau) \cos(\omega(t-\tau)) d\tau,$$

460 in account of the fact that  $\sin(0) = 0$ . Differentiating once more, we find that

$$\begin{aligned} \ddot{y}(t) &= -\omega \int_0^t u(\tau) \sin(\omega(t-\tau)) d\tau + [u(\tau) \cos(\omega(t-\tau))]_{\tau=t} \\ &= -\omega^2 y(t) + u(t). \end{aligned}$$

461 Thus  $y(t)$  solves the ODE (2.6), with initial condition  $y(0) = \dot{y}(0) = 0$ . □

462 **B.2 Proof of Fundamental Lemma 3.5**

463 **Reconstruction of a continuous signal from its sine transform.** Let  $[0, T] \subset \mathbb{R}$  be an interval.  
 464 We recall that we define the windowed sine transform  $\mathcal{L}_t u(\omega)$  of a function  $u : [0, T] \rightarrow \mathbb{R}^p$ , by

$$\mathcal{L}_t u(\omega) = \int_0^t u(t - \tau) \sin(\omega\tau) d\tau, \quad \omega \in \mathbb{R}.$$

465 In the following, we fix a compact set  $K \subset C_0([0, T]; \mathbb{R}^p)$ . Note that for any  $u \in K$ , we have  
 466  $u(0) = 0$ , and hence  $K$  can be identified with a subset of  $C((-\infty, T]; \mathbb{R}^p)$ , consisting of functions  
 467 with  $\text{supp}(u) \subset [0, T]$ . We consider the reconstruction of continuous functions  $u \in K$ . We will show  
 468 that  $u$  can be approximately reconstructed from knowledge of  $\mathcal{L}_t(\omega)$ . More precisely, we provide a  
 469 detailed proof of the following result:

470 **Lemma B.1.** Let  $K \subset C((-\infty, T]; \mathbb{R}^p)$  be compact, such that  $\text{supp}(u) \subset [0, T]$  for all  $u \in K$ . For  
 471 any  $\epsilon, \Delta t > 0$ , there exists  $N \in \mathbb{N}$ , frequencies  $\omega_1, \dots, \omega_N \in \mathbb{R} \setminus \{0\}$ , phase-shifts  $\vartheta_1, \dots, \vartheta_N \in \mathbb{R}$   
 472 and weights  $\alpha_1, \dots, \alpha_N \in \mathbb{R}$ , such that

$$\sup_{\tau \in [0, \Delta t]} \left| u(t - \tau) - \sum_{j=1}^N \alpha_j \mathcal{L}_t u(\omega_j) \sin(\omega_j \tau - \vartheta_j) \right| \leq \epsilon,$$

473 for all  $u \in K$  and for all  $t \in [0, T]$ .

474 *Proof. Step 0: (Equicontinuity)* We recall the following fact from topology. If  $K \subset$   
 475  $C((-\infty, T]; \mathbb{R}^p)$  is compact, then it is equicontinuous; i.e. there exists a continuous modulus  
 476 of continuity  $\phi : [0, \infty) \rightarrow [0, \infty)$  with  $\phi(r) \rightarrow 0$  as  $r \rightarrow 0$ , such that

$$|u(t - \tau) - u(t)| \leq \phi(\tau), \quad \forall \tau \geq 0, t \in [0, T], \forall u \in K. \quad (\text{B.1})$$

477 **Step 1: (Connection to Fourier transform)** Fix  $t_0 \in [0, T]$  and  $u \in K$  for the moment. Define  
 478  $f(\tau) = u(t_0 - \tau)$ . Note that  $f \in C([0, \infty); \mathbb{R}^p)$ , and  $f$  has compact support  $\text{supp}(f) \subset [0, T]$ . We  
 479 also note that, by (B.1), we have

$$|f(t + \tau) - f(t)| \leq \phi(\tau), \quad \forall \tau \geq 0, t \in [0, T].$$

480 We now consider the following odd extension of  $f$  to all of  $\mathbb{R}$ :

$$F(\tau) := \begin{cases} f(\tau), & \text{for } \tau \geq 0, \\ -f(-\tau), & \text{for } \tau \leq 0. \end{cases}$$

481 Since  $F$  is odd, the Fourier transform of  $F$  is given by

$$\widehat{F}(\omega) := \int_{-\infty}^{\infty} F(\tau) e^{-i\omega\tau} d\tau = i \int_{-\infty}^{\infty} F(\tau) \sin(\omega\tau) d\tau = 2i \int_0^T f(\tau) \sin(\omega\tau) d\tau = 2i \mathcal{L}_{t_0} u(\omega).$$

482 Let  $\epsilon > 0$  be arbitrary. Our goal is to uniformly approximate  $F(\tau)$  on the interval  $[0, \Delta t]$ . The main  
 483 complication here is that  $F$  lacks regularity (is discontinuous), and hence the inverse Fourier transform  
 484 of  $\widehat{F}$  does not converge to  $F$  uniformly over this interval; instead, a more careful reconstruction based  
 485 on mollification of  $F$  is needed. We provide the details below.

486 **Step 2: (Mollification)** We now fix a smooth, non-negative and compactly supported function  
 487  $\rho : \mathbb{R} \rightarrow \mathbb{R}$ , such that  $\text{supp}(\rho) \subset [0, 1]$ ,  $\rho \geq 0$ ,  $\int_{\mathbb{R}} \rho(t) dt = 1$ , and we define a mollifier  $\rho_\epsilon(t) :=$   
 488  $\frac{1}{\epsilon} \rho(t/\epsilon)$ . In the following, we will assume throughout that  $\epsilon \leq T$ . We point out that  $\text{supp}(\rho_\epsilon) \subset [0, \epsilon]$ ,  
 489 and hence, the mollification  $F_\epsilon(t) = (F * \rho_\epsilon)(t)$  satisfies, for  $t \geq 0$ :

$$\begin{aligned} |F(t) - F_\epsilon(t)| &= \left| \int_0^\epsilon (F(t) - F(t + \tau)) \rho_\epsilon(\tau) d\tau \right| = \left| \int_0^\epsilon (f(t) - f(t + \tau)) \rho_\epsilon(\tau) d\tau \right| \\ &\leq \left\{ \sup_{\tau \in [0, \epsilon]} |f(t) - f(t + \tau)| \right\} \int_0^\epsilon \rho_\epsilon(\tau) d\tau \leq \phi(\epsilon). \end{aligned}$$

490 In particular, this shows that

$$\sup_{t \in [0, T]} |F(t) - F_\epsilon(t)| \leq \phi(\epsilon),$$

491 can be made arbitrarily small, with an error that depends only on the modulus of continuity  $\phi$ .

492 **Step 3: (Fourier inverse)** Let  $\widehat{F}_\epsilon(\omega)$  denote the Fourier transform of  $F_\epsilon$ . Since  $F_\epsilon$  is smooth and  
493 compactly supported, it is well-known that we have the identity

$$F_\epsilon(\tau) = \frac{1}{2\pi} \int_{-\infty}^{\infty} \widehat{F}_\epsilon(\omega) e^{-i\omega\tau} d\omega, \quad \forall \tau \in \mathbb{R},$$

494 where  $\omega \mapsto \widehat{F}_\epsilon(\omega)$  decays to zero very quickly (almost exponentially) as  $|\omega| \rightarrow \infty$ . In fact, since  
495  $F_\epsilon = F * \rho_\epsilon$  is a convolution, we have  $\widehat{F}_\epsilon(\omega) = \widehat{F}(\omega) \widehat{\rho}_\epsilon(\omega)$ , where  $|\widehat{F}(\omega)| \leq 2\|f\|_{L^\infty} T$  is uniformly  
496 bounded, and  $\widehat{\rho}_\epsilon(\omega)$  decays quickly. In particular, this implies that there exists a  $L = L(\epsilon, T) > 0$   
497 independent of  $f$ , such that

$$\left| F_\epsilon(\tau) - \frac{1}{2\pi} \int_{-L}^L \widehat{F}(\omega) \widehat{\rho}_\epsilon(\omega) e^{-i\omega\tau} d\omega \right| \leq 2T\|f\|_{L^\infty} \int_{|\omega| > L} |\widehat{\rho}_\epsilon(\omega)| d\omega \leq \|f\|_{L^\infty} \epsilon, \quad \forall \tau \in \mathbb{R}. \quad (\text{B.2})$$

498 **Step 4: (Quadrature)** Next, we observe that, since  $F$  and  $\rho_\epsilon$  are compactly supported, their Fourier  
499 transform  $\omega \mapsto \widehat{F}(\omega) \widehat{\rho}_\epsilon(\omega) e^{-i\omega\tau}$  is smooth; in fact, for  $|\tau| \leq T$ , the Lipschitz constant of this  
500 mapping can be explicitly estimated by noting that

$$\begin{aligned} \frac{\partial}{\partial \omega} \left[ \widehat{F}(\omega) \widehat{\rho}_\epsilon(\omega) e^{-i\omega\tau} \right] &= \frac{\partial}{\partial \omega} \int_{\text{supp}(F_\epsilon)} (F * \rho_\epsilon)(t) e^{i\omega(t-\tau)} dt \\ &= \int_{\text{supp}(F_\epsilon)} i(t - \tau) (F * \rho_\epsilon)(t) e^{i\omega(t-\tau)} dt. \end{aligned}$$

501 We next take absolute values, and note that any  $t$  in the support of  $F_\epsilon$  obeys the bound  $|t| \leq T + \epsilon \leq$   
502  $2T$ , while  $|\tau| \leq T$  by assumption; it follows that

$$\text{Lip} \left( \omega \mapsto \widehat{F}(\omega) \widehat{\rho}_\epsilon(\omega) e^{-i\omega\tau} \right) \leq (2T + T) \|F\|_{L^\infty} \|\rho_\epsilon\|_{L^1} = 3T \|F\|_{L^\infty}, \quad \forall \tau \in [0, T].$$

503 It thus follows from basic results on quadrature that for an equidistant choice of frequencies  $\omega_1 <$   
504  $\dots < \omega_N$ , with spacing  $\Delta\omega = 2L/(N - 1)$ , we have

$$\left| \frac{1}{2\pi} \int_{-L}^L \widehat{F}(\omega) \widehat{\rho}_\epsilon(\omega) e^{-i\omega\tau} d\omega - \frac{\Delta\omega}{2\pi} \sum_{j=1}^N \widehat{F}(\omega_j) \widehat{\rho}_\epsilon(\omega_j) e^{-i\omega_j\tau} \right| \leq \frac{CL^2 3T \|F\|_{L^\infty}}{N}, \quad \forall \tau \in [0, T],$$

505 for an absolute constant  $C > 0$ , independent of  $F$ ,  $T$  and  $N$ . By choosing  $N$  to be even, we can  
506 ensure that  $\omega_j \neq 0$  for all  $j$ . In particular, recalling that  $L = L(T, \epsilon)$  depends only on  $\epsilon$  and  $T$ , and  
507 choosing  $N = N(T, \epsilon)$  sufficiently large, we can combine the above estimate with (B.2) to ensure  
508 that

$$\left| F_\epsilon(\tau) - \frac{\Delta\omega}{2\pi} \sum_{j=1}^N \widehat{F}(\omega_j) \widehat{\rho}_\epsilon(\omega_j) e^{-i\omega_j\tau} \right| \leq 2\|f\|_{L^\infty} \epsilon, \quad \forall \tau \in [0, T],$$

509 where we have taken into account that  $\|F\|_{L^\infty} = \|f\|_{L^\infty}$ .

510 **Step 5: (Conclusion)** To conclude the proof, we recall that  $\widehat{F}(\omega) = 2i\mathcal{L}_{t_0} u(\omega)$  can be expressed  
511 in terms of the sine transform  $\mathcal{L}_t u$  of the function  $u$  which was fixed at the beginning of Step 1.  
512 Recall also that  $f(\tau) = u(t_0 - \tau)$ , so that  $\|f\|_{L^\infty} = \|u\|_{L^\infty}$ . Hence, we can write the real part of  
513  $\frac{\Delta\omega}{2\pi} \widehat{F}(\omega_j) \widehat{\rho}_\epsilon(\omega_j) e^{-i\omega_j\tau} = \frac{\Delta\omega}{2\pi} 2i\mathcal{L}_{t_0} u(\omega_j) \widehat{\rho}_\epsilon(\omega_j) e^{-i\omega_j\tau}$ , in the form  $\alpha_j \mathcal{L}_{t_0}(\omega_j) \sin(\omega_j\tau - \vartheta_j)$  for  
514 coefficients  $\alpha_j \in \mathbb{R}$  and  $\theta_j \in \mathbb{R}$  which depend only on  $\Delta\omega$  and  $\widehat{\rho}_\epsilon(\omega_j)$ , but are independent of  $u$ . In

515 particular, it follows that

$$\begin{aligned}
\sup_{\tau \in [0, \Delta t]} \left| u(t_0 - \tau) - \sum_{j=1}^N \alpha_j \mathcal{L}_{t_0} u(\omega_j) \sin(\omega_j \tau - \vartheta_j) \right| &= \sup_{t \in [0, \Delta t]} \left| F(\tau) - \operatorname{Re} \left( \frac{\Delta \omega}{2\pi} \sum_{j=1}^N \widehat{F}(\omega_j) \widehat{\rho}_\epsilon(\omega_j) e^{-i\omega_j \tau} \right) \right| \\
&\leq \sup_{\tau \in [0, \Delta t]} \left| F(\tau) - \frac{\Delta \omega}{2\pi} \sum_{j=1}^N \widehat{F}(\omega_j) \widehat{\rho}_\epsilon(\omega_j) e^{-i\omega_j \tau} \right| \\
&\leq \sup_{\tau \in [0, \Delta t]} |F(\tau) - F_\epsilon(\tau)| \\
&\quad + \sup_{\tau \in [0, \Delta t]} \left| F_\epsilon(\tau) - \frac{\Delta \omega}{2\pi} \sum_{j=1}^N \widehat{F}(\omega_j) \widehat{\rho}_\epsilon(\omega_j) e^{-i\omega_j \tau} \right|.
\end{aligned}$$

516 By Steps 1 and 3, the first term on the right-hand side is bounded by  $\leq \phi(\epsilon)$ , while the second one is  
517 bounded by  $\leq 2 \sup_{u \in K} \|u\|_{L^\infty} \epsilon \leq C\epsilon$ , where  $C = C(K) < \infty$  depends only on the compact set  
518  $K \subset C([0, T]; \mathbb{R}^p)$ . Hence, we have

$$\sup_{\tau \in [0, \Delta t]} \left| u(t_0 - \tau) - \sum_{j=1}^N \alpha_j \mathcal{L}_{t_0} u(\omega_j) \sin(\omega_j \tau - \vartheta_j) \right| \leq \phi(\epsilon) + C\epsilon.$$

519 In this estimate, the function  $u \in K$  and  $t_0 \in [0, T]$  were arbitrary, and the modulus of continuity  $\phi$   
520 as well as the constant  $C$  on the right-hand side depend only on the set  $K$ . It thus follows that for this  
521 choice of  $\alpha_j, \omega_j$  and  $\vartheta_j$ , we have

$$\sup_{u \in K} \sup_{t \in [0, T]} \sup_{\tau \in [0, \Delta t]} \left| u(t - \tau) - \sum_{j=1}^N \alpha_j \mathcal{L}_t u(\omega_j) \sin(\omega_j \tau - \vartheta_j) \right| \leq \phi(\epsilon) + C\epsilon.$$

522 Since  $\epsilon > 0$  was arbitrary, the right-hand side can be made arbitrarily small. The claim then readily  
523 follows. □

524

525 The next step in the proof of the fundamental Lemma 3.5 needs the following preliminary result in  
526 functional analysis,

527 **Lemma B.2.** Let  $\mathcal{X}, \mathcal{Y}$  be Banach spaces, and let  $K \subset \mathcal{X}$  be a compact subset. Assume that  
528  $\Phi : \mathcal{X} \rightarrow \mathcal{Y}$  is continuous. Then for any  $\epsilon > 0$ , there exists a  $\delta > 0$ , such that if  $\|u - u^K\|_{\mathcal{X}} \leq \delta$  with  
529  $u \in \mathcal{X}, u^K \in K$ , then  $\|\Phi(u) - \Phi(u^K)\|_{\mathcal{Y}} \leq \epsilon$ .

530 *Proof.* Suppose not. Then there exists  $\epsilon_0 > 0$  and a sequence  $u_j, u_j^K, (j \in \mathbb{N})$ , such that  $\|u_j -$   
531  $u_j^K\|_{\mathcal{X}} \leq j^{-1}$ , while  $\|\Phi(u_j) - \Phi(u_j^K)\|_{\mathcal{Y}} \geq \epsilon_0$ . By the compactness of  $K$ , we can extract a  
532 subsequence  $j_k \rightarrow \infty$ , such that  $u_{j_k}^K \rightarrow u^K$  converges to some  $u^K \in K$ . By assumption on  $u_j$ , this  
533 implies that

$$\|u_{j_k} - u^K\|_{\mathcal{X}} \leq \|u_{j_k} - u_{j_k}^K\|_{\mathcal{X}} + \|u_{j_k}^K - u^K\|_{\mathcal{X}} \xrightarrow{(k \rightarrow \infty)} 0,$$

534 which, by the assumed continuity of  $\Phi$ , leads to the contradiction that  $0 < \epsilon_0 \leq \|\Phi(u_{j_k}) -$   
535  $\Phi(u^K)\|_{\mathcal{Y}} \rightarrow 0$ , as  $k \rightarrow \infty$ . □

536 **Proof of Lemma 3.5.** Now, we can prove the fundamental Lemma in the following,

537 *Proof.* Let  $\epsilon > 0$  be given. We can identify  $K \subset C_0([0, T]; \mathbb{R}^p)$  with a compact subset of  
538  $C((-\infty, T]; \mathbb{R}^p)$ , by extending all  $u \in K$  by zero for negative times, i.e. we set  $u(t) = 0$  for  
539  $t < 0$ . Applying Lemma B.2, with  $\mathcal{X} = C_0([0, T]; \mathbb{R}^p)$  and  $\mathcal{Y} = C_0([0, T]; \mathbb{R}^q)$ , we can find a  $\delta > 0$ ,  
540 such that for any  $u \in C_0([0, T]; \mathbb{R}^p)$  and  $u^K \in K$ , we have

$$\|u - u^K\|_{L^\infty} \leq \delta \quad \Rightarrow \quad \|\Phi(u) - \Phi(u^K)\|_{L^\infty} \leq \epsilon. \tag{B.3}$$

541 By the inverse sine transform Lemma B.1, there exist  $N \in \mathbb{N}$ , frequencies  $\omega_1, \dots, \omega_N \neq 0$ , phase-  
 542 shifts  $\vartheta_1, \dots, \vartheta_N$  and coefficients  $\alpha_1, \dots, \alpha_N$ , such that for any  $u \in K$  and  $t \in [0, T]$ :

$$\sup_{\tau \in [0, T]} \left| u(t - \tau) - \sum_{j=1}^N \alpha_j \mathcal{L}_t u(\omega_j) \sin(\omega_j \tau - \vartheta_j) \right| \leq \delta.$$

543 Given  $\mathcal{L}_t u(\omega_1), \dots, \mathcal{L}_t u(\omega_N)$ , we can thus define a reconstruction mapping  $\mathcal{R} : \mathbb{R}^N \times [0, T] \rightarrow$   
 544  $C([0, T]; \mathbb{R}^p)$  by

$$\mathcal{R}(\beta_1, \dots, \beta_N; t)(\tau) := \sum_{j=1}^N \alpha_j \beta_j \sin(\omega_j(t - \tau) - \vartheta_j).$$

545 Then, for  $\tau \in [0, t]$ , we have

$$|u(\tau) - \mathcal{R}(\mathcal{L}_t u(\omega_1), \dots, \mathcal{L}_t u(\omega_N); t)(\tau)| \leq \delta.$$

546 We can now uniquely define  $\Psi : \mathbb{R}^N \times [0, T^2/4] \rightarrow C_0([0, T]; \mathbb{R}^p)$ , by the identity

$$\Psi(\mathcal{L}_t u(\omega_1), \dots, \mathcal{L}_t u(\omega_N); t^2/4) = \Phi(\mathcal{R}(\mathcal{L}_t u(\omega_1), \dots, \mathcal{L}_t u(\omega_N); t)).$$

547 Using the short-hand notation  $\mathcal{R}_t u = \mathcal{R}(\mathcal{L}_t u(\omega_1), \dots, \mathcal{L}_t u(\omega_N); t)$ , we have  $\sup_{\tau \in [0, t]} |u(\tau) -$   
 548  $\mathcal{R}_t u(\tau)| \leq \delta$ , for all  $t \in [0, T]$ . By (B.3), this implies that

$$|\Phi(u)(t) - \Psi(\mathcal{L}_t u(\omega_1), \dots, \mathcal{L}_t u(\omega_N); t^2/4)| = |\Phi(u)(t) - \Phi(\mathcal{R}_t u)(t)| \leq \epsilon.$$

549 □

### 550 B.3 Proof of Lemma 3.6

551 *Proof.* Let  $\omega \neq 0$  be given. For a (small) parameter  $s > 0$ , we consider

$$\ddot{y}_s = \frac{1}{s} \sigma(-s\omega^2 y_s + su), \quad y_s(0) = \dot{y}_s(0) = 0.$$

552 Let  $Y$  be the solution of

$$\ddot{Y} = -\omega^2 Y + u, \quad Y(0) = \dot{Y}(0) = 0.$$

553 Then we have, on account of  $\sigma(0) = 0$  and  $\sigma'(0) = 1$ ,

$$\begin{aligned} s^{-1} \sigma(-s\omega^2 Y + su) - [-\omega^2 Y + u] &= \frac{\sigma(-s\omega^2 Y + su) - \sigma(0)}{s} - \sigma'(0)[- \omega^2 Y + u] \\ &= \frac{1}{s} \int_0^s \frac{\partial}{\partial \zeta} [\sigma(-\zeta \omega^2 Y + \zeta u)] d\zeta - \sigma'(0)[- \omega^2 Y + u] \\ &= \frac{1}{s} \left( \int_0^s [\sigma'(-\zeta \omega^2 Y + \zeta u) - \sigma'(0)] d\zeta \right) [- \omega^2 Y + u]. \end{aligned}$$

554 It follows from Lemma 3.4 that for any input  $u \in K$ , with  $\sup_{u \in K} \|u\|_{L^\infty} =: B < \infty$ , we have a  
 555 uniform bound  $\|Y\|_{L^\infty} \leq BT/\omega$ , hence we can estimate

$$|-\omega^2 Y + u| \leq B(\omega T + 1),$$

556 uniformly for all such  $u$ . In particular, it follows that

$$\left| s^{-1} \sigma(-s\omega^2 Y + su) - [-\omega^2 Y + u] \right| \leq B(T\omega + 1) \sup_{|x| \leq sB(T\omega + 1)} |\sigma'(x) - \sigma'(0)|.$$

557 Clearly, for any  $\delta > 0$ , we can choose  $s \in (0, 1]$  sufficiently small, such that the right hand-side is  
 558 bounded by  $\delta$ , i.e. with this choice of  $s$ ,

$$\left| s^{-1} \sigma(-s\omega^2 Y(t) + su(t)) - [-\omega^2 Y(t) + u(t)] \right| \leq \delta, \quad \forall t \in [0, T],$$

559 holds for any choice of  $u \in K$ . We will fix this choice of  $s$  in the following, and write  $g(y, u) :=$   
 560  $s^{-1} \sigma(-s\omega^2 y + su)$ . We note that  $g$  is Lipschitz continuous in  $y$ , for all  $|y| \leq BT/\omega$  and  $|u| \leq B$ ,  
 561 with  $\text{Lip}_y(g) \leq \omega^2 \sup_{|\xi| \leq B(\omega T + 1)} |\sigma'(\xi)|$ .

562 To summarize, we have shown that  $Y$  solves

$$\ddot{Y} = g(Y, u) + f, \quad Y(0) = \dot{Y}(0) = 0,$$

563 where  $\|f\|_{L^\infty} \leq \delta$ . By definition,  $y_s$  solves

$$\ddot{y}_s = g(y_s, u), \quad y_s(0) = \dot{y}_s(0) = 0.$$

564 It follows from this that

$$\begin{aligned} |y_s(t) - Y(t)| &\leq \int_0^t \int_0^\tau \{ |g(y_s(\theta), u(\theta)) - g(Y(\theta), u(\theta))| + |f(\theta)| \} d\theta d\tau \\ &\leq \int_0^t \int_0^\tau \{ \text{Lip}_y(g) |y_s(\theta) - Y(\theta)| + \delta \} d\theta d\tau \\ &\leq T\omega^2 \sup_{|\xi| \leq B(\omega T + 1)} |\sigma'(\xi)| \int_0^t |y_s(\tau) - Y(\tau)| d\tau + T^2\delta. \end{aligned}$$

565 Recalling that  $Y(t) = \mathcal{L}_t u(\omega)$ , then by Gronwall's inequality, the last estimate implies that

$$\sup_{t \in [0, T]} |y_s(t) - \mathcal{L}_t u(\omega)| = \sup_{t \in [0, T]} |y_s - Y| \leq C\delta,$$

566 for a constant  $C = C(T, \omega, \sup_{|\xi| \leq B(\omega T + 1)} |\sigma'(\xi)|) > 0$ , depending only on  $T, \omega, B$  and  $\sigma'$ . Since  
567  $\delta > 0$  was arbitrary, we can ensure that  $C\delta \leq \epsilon$ . Thus, we have shown that a suitably rescaled  
568 nonlinear oscillator approximates the harmonic oscillator to any desired degree of accuracy, and  
569 uniformly for all  $u \in K$ .

570 To finish the proof, we observe that  $y$  solves

$$\ddot{y} = \sigma(-\omega^2 y + su), \quad y(0) = \dot{y}(0) = 0,$$

571 if, and only if,  $y_s = y/s$  solves

$$\ddot{y}_s = s^{-1} \sigma(-s\omega^2 y_s + su), \quad y_s(0) = \dot{y}_s(0) = 0.$$

572 Hence, with  $W = -\omega^2, V = s, b = 0$  and  $A = s^{-1}$ , we have

$$\sup_{t \in [0, T]} |Ay(t) - \mathcal{L}_t u(\omega)| = \sup_{t \in [0, T]} |y_s(t) - \mathcal{L}_t u(\omega)| \leq \epsilon.$$

573 This concludes the proof. □

#### 574 **B.4 Proof of Lemma 3.7**

575 *Proof.* Let  $\epsilon, \Delta t$  be given. By the sine transform reconstruction Lemma B.1, there exists  $N \in \mathbb{N}$ ,  
576 frequencies  $\omega_1, \dots, \omega_N$ , weights  $\alpha_1, \dots, \alpha_N$  and phase-shifts  $\vartheta_1, \dots, \vartheta_N$ , such that

$$\sup_{\tau \in [0, \Delta t]} \left| u(t - \tau) - \sum_{j=1}^N \alpha_j \mathcal{L}_t u(\omega_j) \sin(\omega_j \tau - \vartheta_j) \right| \leq \frac{\epsilon}{2}, \quad \forall t \in [0, T], \forall u \in K, \quad (\text{B.4})$$

577 where any  $u \in K$  is extended by zero to negative times. It follows from Lemma 3.6, that there exists  
578 a coupled oscillator network,

$$\ddot{y} = \sigma(w \odot y + Vu + b), \quad y(0) = \dot{y}(0) = 0,$$

579 with dimension  $m = pN$ , and  $w \in \mathbb{R}^m, V \in \mathbb{R}^{m \times p}$ , and a linear output layer  $y \mapsto \tilde{A}y, \tilde{A} \in \mathbb{R}^{m \times m}$ ,  
580 such that  $[\tilde{A}y(t)]_j \approx \mathcal{L}_t u(\omega_j)$  for  $j = 1, \dots, N$ ; more precisely, such that

$$\sup_{t \in [0, T]} \sum_{j=1}^N |\alpha_j| \left| \mathcal{L}_t u(\omega_j) - [\tilde{A}y]_j(t) \right| \leq \frac{\epsilon}{2}, \quad \forall u \in K. \quad (\text{B.5})$$

581 Composing with another linear layer  $B : \mathbb{R}^m \simeq \mathbb{R}^{p \times N} \rightarrow \mathbb{R}^p$ , which maps  $\beta = [\beta_1, \dots, \beta_N]$  to

$$B\beta := \sum_{j=1}^N \alpha_j \beta_j \sin(\omega_j \Delta t - \vartheta_j) \in \mathbb{R}^p,$$

582 we define  $A := B\tilde{A}$ , and observe that from (B.4) and (B.5):

$$\begin{aligned} \sup_{t \in [0, T]} |u(t - \Delta t) - Ay(t)| &\leq \sup_{t \in [0, T]} \left| u(t - \Delta t) - \sum_{j=1}^N \alpha_j \mathcal{L}_t u(\omega_j) \sin(\omega_j \Delta t - \vartheta_j) \right| \\ &\quad + \sup_{t \in [0, T]} \sum_{j=1}^N |\alpha_j| \left| \mathcal{L}_t u(\omega_j) - [\tilde{A}y]_j(t) \right| |\sin(\omega_j \Delta t - \vartheta_j)| \\ &\leq \epsilon. \end{aligned}$$

583

□

### 584 B.5 Proof of Lemma 3.8

585 *Proof.* Fix  $\Sigma, \Lambda, \gamma$  as in the statement of the lemma. Our goal is to approximate  $u \mapsto \Sigma\sigma(\Lambda u + \gamma)$ .

586 **Step 1: (nonlinear layer)** We consider a first layer for a hidden state  $y = [y_1, y_2]^T \in \mathbb{R}^{p+p}$ , given by

$$\left\{ \begin{array}{l} \ddot{y}_1(t) = \sigma(\Lambda u(t) + \gamma) \\ \ddot{y}_2(t) = \sigma(\gamma) \end{array} \right\}, \quad y(0) = \dot{y}(0) = 0.$$

587 This layer evidently does not approximate  $\sigma(\Lambda u(t) + \gamma)$ ; however, it does encode this value in  
588 the second derivative of the hidden variable  $y_1$ . The main objective of the following analysis is to  
589 approximately compute  $\ddot{y}_1(t)$  through a suitably defined additional layer.

590 **Step 2: (Second-derivative layer)** To obtain an approximation of  $\sigma(\Lambda u(t) + \gamma)$ , we first note that  
591 the solution operator

$$\mathcal{S} : u(t) \mapsto \eta(t), \quad \text{where } \ddot{\eta}(t) = \sigma(\Lambda u(t) + \gamma) - \sigma(\gamma), \quad \eta(0) = \dot{\eta}(0) = 0,$$

592 defines a continuous mapping  $\mathcal{S} : C_0([0, T]; \mathbb{R}^p) \rightarrow C_0^2([0, T]; \mathbb{R}^p)$ , with  $\eta(0) = \dot{\eta}(0) = \ddot{\eta}(0) = 0$ .  
593 Note that  $\eta$  is very closely related to  $y_1$ . The fact that  $\ddot{\eta} = 0$  is important to us, because it allows  
594 us to *smoothly* extend  $\eta$  to negative times by setting  $\eta(t) := 0$  for  $t < 0$  (which would not be true  
595 for  $y_1(t)$ ). The resulting extension defines a compactly supported function  $\eta : (-\infty, 0] \rightarrow \mathbb{R}^p$ ,  
596 with  $\eta \in C^2((-\infty, T]; \mathbb{R}^p)$ . Furthermore, by continuity of the operator  $\mathcal{S}$ , the image  $\mathcal{S}(K)$  of the  
597 compact set  $K$  under  $\mathcal{S}$  is compact in  $C^2((-\infty, T]; \mathbb{R}^p)$ . From this, it follows that for small  $\Delta t > 0$ ,  
598 the second-order backward finite difference formula converges,

$$\sup_{t \in [0, T]} \left| \frac{\eta(t) - 2\eta(t - \Delta t) + \eta(t - 2\Delta t)}{\Delta t^2} - \ddot{\eta}(t) \right| = o_{\Delta t \rightarrow 0}(1), \quad \forall \eta = \mathcal{S}(u), u \in K,$$

599 where the bound on the right-hand side is uniform in  $u \in K$ , due to equicontinuity of  
600  $\{\ddot{\eta} \mid \eta = \mathcal{S}(u), u \in K\}$ . In particular, the second derivative of  $\eta$  can be approximated through  
601 *linear combinations of time-delays of  $\eta$* . We can now choose  $\Delta t > 0$  sufficiently small so that

$$\sup_{t \in [0, T]} \left| \frac{\eta(t) - 2\eta(t - \Delta t) + \eta(t - 2\Delta t)}{\Delta t^2} - \ddot{\eta}(t) \right| \leq \frac{\epsilon}{2\|\Sigma\|}, \quad \forall \eta = \mathcal{S}(u), u \in K,$$

602 where  $\|\Sigma\|$  denotes the operator norm of the matrix  $\Sigma$ . By Lemma 3.7, applied to the input set  
603  $\tilde{K} = \mathcal{S}(K) \subset C_0([0, T]; \mathbb{R}^p)$ , there exists a coupled oscillator

$$\ddot{z}(t) = \sigma(w \odot z(t) + V\eta(t) + b), \quad z(0) = \dot{z}(0) = 0, \quad (\text{B.6})$$

604 and a linear output layer  $z \mapsto \tilde{A}z$ , such that

$$\sup_{t \in [0, T]} \left| [\eta(t) - 2\eta(t - \Delta t) + \eta(t - 2\Delta t)] - \tilde{A}z(t) \right| \leq \frac{\epsilon \Delta t^2}{2\|\Sigma\|}, \quad \forall \eta = \mathcal{S}(u), u \in K.$$

605 Indeed, Lemma 3.7 shows that time-delays of any given input signal can be approximated with any  
606 desired accuracy, and  $\eta(t) - 2\eta(t - \Delta t) + \eta(t - 2\Delta t)$  is simply a linear combination of time-delays  
607 of the input signal  $\eta$  in (B.6).

608 To connect  $\eta(t)$  back to the  $y(t) = [y_1(t), y_2(t)]^T$  constructed in Step 1, we note that

$$\ddot{\eta} = \sigma(Au(t) + b) - \sigma(b) = \ddot{y}_1 - \ddot{y}_2,$$

609 and hence, taking into account the initial values, we must have  $\eta \equiv y_1 - y_2$  by ODE uniqueness. In  
 610 particular, upon defining a matrix  $\tilde{V}$  such that  $\tilde{V}y := Vy_1 - Vy_2 \equiv V\eta$ , we can equivalently write  
 611 (B.6) in the form,

$$\ddot{z}(t) = \sigma(w \odot z(t) + \tilde{V}y(t) + b), \quad z(0) = \dot{z}(0) = 0. \quad (\text{B.7})$$

612 **Step 3: (Conclusion)**

613 Composing the layers from Step 1 and 2, we obtain a coupled oscillator

$$\ddot{y}^\ell = \sigma(w^\ell \odot y^\ell + V^\ell y^{\ell-1} + b^\ell), \quad (\ell = 1, 2),$$

614 initialized at rest, with  $y^1 = y, y^2 = z$ , such that for  $A := \Sigma\tilde{A}$  and  $c := \Sigma\sigma(\gamma)$ , we obtain

$$\begin{aligned} \sup_{t \in [0, T]} |[Ay^2(t) + c] - \Sigma\sigma(\Lambda u(t) + \gamma)| &\leq \|\Sigma\| \sup_{t \in [0, T]} \left| \tilde{A}z(t) - [\sigma(\Lambda u(t) + \gamma) - \sigma(\gamma)] \right| \\ &= \|\Sigma\| \sup_{t \in [0, T]} \left| \tilde{A}z(t) - \ddot{\eta}(t) \right| \\ &\leq \|\Sigma\| \sup_{t \in [0, T]} \left| \tilde{A}z(t) - \frac{\eta(t) - 2\eta(t - \Delta t) + \eta(t - 2\Delta t)}{\Delta t^2} \right| \\ &\quad + \|\Sigma\| \sup_{t \in [0, T]} \left| \frac{\eta(t) - 2\eta(t - \Delta t) + \eta(t - 2\Delta t)}{\Delta t^2} - \ddot{\eta}(t) \right| \\ &\leq \frac{\epsilon}{2} + \frac{\epsilon}{2} = \epsilon. \end{aligned}$$

615 This concludes the proof. □

616 **B.6 Proof of Theorem 3.1**

617 *Proof. Step 1:* By the Fundamental Lemma 3.5, there exist  $N$ , a continuous mapping  $\Psi$ , and  
 618 frequencies  $\omega_1, \dots, \omega_N$ , such that

$$|\Phi(u)(t) - \Psi(\mathcal{L}_t u(\omega_1), \dots, \mathcal{L}_t u(\omega_N); t^2/4)| \leq \epsilon,$$

619 for all  $u \in K$ , and  $t \in [0, T]$ . Let  $M$  be a constant such that

$$|\mathcal{L}_t u(\omega_1)|, \dots, |\mathcal{L}_t u(\omega_N)|, \frac{t^2}{4} \leq M,$$

620 for all  $u \in K$  and  $t \in [0, T]$ . By the universal approximation theorem for ordinary neural networks,  
 621 there exist weight matrices  $\Sigma, \Lambda$  and bias  $\gamma$ , such that

$$|\Psi(\beta_1, \dots, \beta_N; t^2/4) - \Sigma\sigma(\Lambda\beta + \gamma)| \leq \epsilon, \quad \beta := [\beta_1, \dots, \beta_N; t^2/4]^T,$$

622 holds for all  $t \in [0, T]$ ,  $|\beta_1|, \dots, |\beta_N| \leq M$ .

623 **Step 2:** Fix  $\epsilon_1 \leq 1$  sufficiently small, such that also  $\|\Sigma\| \|\Lambda\| \text{Lip}(\sigma) \epsilon_1 \leq \epsilon$ , where  $\text{Lip}(\sigma) :=$   
 624  $\sup_{|\xi| \leq \|\Lambda\| M + |\gamma| + 1} |\sigma'(\xi)|$  denotes an upper bound on the Lipschitz constant of the activation func-  
 625 tion over the relevant range of input values. It follows from Lemma 3.6, that there exists an oscillator  
 626 network,

$$\ddot{y}^1 = \sigma(w^1 \odot y^1 + V^1 u + b^1), \quad y^1(0) = \dot{y}^1(0) = 0, \quad (\text{B.8})$$

627 of depth 1, such that

$$\sup_{t \in [0, T]} |[\mathcal{L}_t u(\omega_1), \dots, \mathcal{L}_t u(\omega_N); t^2/4]^T - A^1 y^1(t)| \leq \epsilon_1,$$

628 for all  $u \in K$ .

629 **Step 3:** Finally, by Lemma 3.8, there exists an oscillator network,

$$\ddot{y}^2 = \sigma(w^2 \odot y^2 + V^2 y^1 + b^1),$$

630 of depth 2, such that

$$\sup_{t \in [0, T]} |A^2 y^2(t) - \Sigma\sigma(\Lambda A^1 y^1(t) + \gamma)| \leq \epsilon,$$



631 holds for all  $y^1$  belonging to the compact set  $K_1 := \mathcal{S}(K) \subset C_0([0, T]; \mathbb{R}^{N+1})$ , where  $\mathcal{S}$  denotes  
 632 the solution operator of (B.8).

633 **Step 4:** Thus, we have for any  $u \in K$ , and with short-hand  $\mathcal{L}_t u(\boldsymbol{\omega}) := (\mathcal{L}_t u(\omega_1), \dots, \mathcal{L}_t u(\omega_N))$ ,

$$\begin{aligned} |\Phi(u)(t) - A^2 y^2(t)| &\leq |\Phi(u)(t) - \Psi(\mathcal{L}_t u(\boldsymbol{\omega}); t^2/4)| \\ &\quad + |\Psi(\mathcal{L}_t u(\boldsymbol{\omega}); t^2/4) - \Sigma\sigma(\Lambda[\mathcal{L}_t u(\boldsymbol{\omega}); t^2/4] + \gamma)| \\ &\quad + |\Sigma\sigma(\Lambda[\mathcal{L}_t u(\boldsymbol{\omega}); t^2/4] + \gamma) - \Sigma\sigma(\Lambda A^1 y^1(t) + \gamma)| \\ &\quad + |\Sigma\sigma(\Lambda A_1 y_1(t) + \gamma) - A^2 y^2(t)|. \end{aligned}$$

634 By step 1, we can estimate

$$|\Phi(u)(t) - \Psi(\mathcal{L}_t u(\boldsymbol{\omega}); t^2/4)| \leq \epsilon, \quad \forall t \in [0, T], u \in K.$$

635 By the choice of  $\Sigma, \Lambda, \gamma$ , we have

$$|\Psi(\mathcal{L}_t u(\boldsymbol{\omega}); t^2/4) - \Sigma\sigma(\Lambda[\mathcal{L}_t u(\boldsymbol{\omega}); t^2/4] + \gamma)| \leq \epsilon, \quad \forall t \in [0, T], u \in K.$$

636 By construction of  $y^1$  in Step 2, we have

$$\begin{aligned} &|\Sigma\sigma(\Lambda[\mathcal{L}_t u(\boldsymbol{\omega}); t^2/4] + \gamma) - \Sigma\sigma(\Lambda A_1 y_1(t) + \gamma)| \\ &\leq \|\Sigma\| \text{Lip}(\sigma) \|\Lambda\| |[\mathcal{L}_t u(\boldsymbol{\omega}); t^2/4] - A^1 y^1(t)| \\ &\leq \|\Sigma\| \text{Lip}(\sigma) \|\Lambda\| \epsilon_1 \\ &\leq \epsilon, \end{aligned}$$

637 for all  $t \in [0, T]$  and  $u \in K$ . By construction of  $y^2$  in Step 3, we have

$$|\Sigma\sigma(\Lambda A^1 y^1(t) + \gamma) - A^2 y^2(t)| \leq \epsilon, \quad \forall t \in [0, T], u \in K.$$

638 Thus, we conclude that

$$|\Phi(u)(t) - A^2 y^2(t)| \leq 4\epsilon,$$

639 for all  $t \in [0, T]$  and  $u \in K$ . Since  $\epsilon > 0$  was arbitrary, we conclude that for any causal and  
 640 continuous operator  $\Phi : C_0([0, T]; \mathbb{R}^p) \rightarrow C_0([0, T]; \mathbb{R}^q)$ , compact set  $K \subset C_0([0, T]; \mathbb{R}^p)$  and  
 641  $\epsilon > 0$ , there exists a coupled oscillator of depth 3, which uniformly approximates  $\Phi$  to accuracy  $\epsilon$  for  
 642 all  $u \in K$ . This completes the proof.  $\square$
